# Supplementary material for: Refinement of the crystal structure of Li4P2S6 using NMR crystallography
Source: Royal Society of Chemistry journal article supplement (doi:10.1039/c8dt02619j), 2018-01-01

## checkCIF/PLATON report

You have not supplied any structure factors. As a result the full set of tests cannot be run.

THIS REPORT IS FOR GUIDANCE ONLY. IF USED AS PART OF A REVIEW PROCEDURE FOR PUBLICATION, IT SHOULD NOT REPLACE THE EXPERTISE OF AN EXPERIENCED CRYSTALLOGRAPHIC REFEREE.

No syntax errors found.      CIF dictionary      Interpreting this report

### Datablock: I

---

|                 |                 |                    |              |
|-----------------|-----------------|--------------------|--------------|
| Bond precision: | S- P = 0.0287 A | Wavelength=1.54056 |              |
| Cell:           | a=10.51452(6)   | b=10.51452(6)      | c=6.59148(8) |
|                 | alpha=90        | beta=90            | gamma=120    |
| Temperature:    | 298 K           |                    |              |
|                 | Calculated      | Reported           |              |
| Volume          | 631.092(12)     | 631.092(10)        |              |
| Space group     | P 3 2 1         | P 3 2 1            |              |
| Hall group      | P 3 2 "         | P 3 2 "            |              |
| Moiety formula  | P2 S6, 4(Li)    | P2 S6, 4(Li)       |              |
| Sum formula     | Li4 P2 S6       | Li4 P2 S6          |              |
| Mr              | 282.06          | 282.07             |              |
| Dx,g cm-3       | 2.227           | 2.230              |              |
| Z               | 3               | 3                  |              |
| Mu (mm-1)       | 17.600          | 17.929             |              |
| F000            | 414.0           | 0.0                |              |
| F000'           | 421.98          |                    |              |
| h,k,lmax        | 13,13,8         | 8,8,6              |              |
| Nref            | 971[ 565]       | 220                |              |
| Tmin,Tmax       |                 |                    |              |
| Tmin'           |                 |                    |              |

Correction method= Not given

Data completeness= 0.39/0.23      Theta(max)= 89.200

R(reflections)=      wR2(reflections)=

S =      Npar=

---

The following ALERTS were generated. Each ALERT has the format  
**test-name\_ALERT\_alert-type\_alert-level.**  
Click on the hyperlinks for more details of the test.

---

### ● Alert level C

REFI015\_ALERT\_1\_C \_refine\_ls\_shift/su\_max is missing  
Maximum shift/s.u. ratio after final refinement cycle.  
The following tests will not be performed  
SHFSU\_01

---

### ● Alert level G

|                   |                                                  |         |              |
|-------------------|--------------------------------------------------|---------|--------------|
| PLAT004_ALERT_5_G | Polymeric Structure Found with Maximum Dimension | 2       | Info         |
| PLAT092_ALERT_4_G | Check: Wavelength Given is not Cu,Ga,Mo,Ag,In Ka | 1.54056 | Ang.         |
| PLAT112_ALERT_2_G | ADDSYM Detects New (Pseudo) Symm. Elem           | 63      | 80 %Fit      |
| PLAT112_ALERT_2_G | ADDSYM Detects New (Pseudo) Symm. Elem           | m       | 80 %Fit      |
| PLAT112_ALERT_2_G | ADDSYM Detects New (Pseudo) Symm. Elem           | m       | 80 %Fit      |
| PLAT112_ALERT_2_G | ADDSYM Detects New (Pseudo) Symm. Elem           | m       | 80 %Fit      |
| PLAT113_ALERT_2_G | ADDSYM Suggests Possible Pseudo/New Space Group  | P63mc   | Check        |
| PLAT152_ALERT_1_G | The Supplied and Calc. Volume s.u. Differ by ... | 2       | Units        |
| PLAT802_ALERT_4_G | CIF Input Record(s) with more than 80 Characters | 4       | Info         |
| PLAT981_ALERT_1_G | No non-zero f" Anomalous Scattering Values Found |         | Please Check |
| PLAT986_ALERT_1_G | No non-zero f' Anomalous Scattering Values Found |         | Please Check |

---

- 0 **ALERT level A** = Most likely a serious problem - resolve or explain  
0 **ALERT level B** = A potentially serious problem, consider carefully  
1 **ALERT level C** = Check. Ensure it is not caused by an omission or oversight  
11 **ALERT level G** = General information/check it is not something unexpected
- 4 ALERT type 1 CIF construction/syntax error, inconsistent or missing data  
5 ALERT type 2 Indicator that the structure model may be wrong or deficient  
0 ALERT type 3 Indicator that the structure quality may be low  
2 ALERT type 4 Improvement, methodology, query or suggestion  
1 ALERT type 5 Informative message, check
- 

## checkCIF publication errors

### ● Alert level G

PUBL017\_ALERT\_1\_G The \_publ\_section\_references section is missing or empty.

---

- 0 **ALERT level A** = Data missing that is essential or data in wrong format  
1 **ALERT level G** = General alerts. Data that may be required is missing
-

## Publication of your CIF

You should attempt to resolve as many as possible of the alerts in all categories. Often the minor alerts point to easily fixed oversights, errors and omissions in your CIF or refinement strategy, so attention to these fine details can be worthwhile. In order to resolve some of the more serious problems it may be necessary to carry out additional measurements or structure refinements. However, the nature of your study may justify the reported deviations from journal submission requirements and the more serious of these should be commented upon in the discussion or experimental section of a paper or in the "special\_details" fields of the CIF. *checkCIF* was carefully designed to identify outliers and unusual parameters, but every test has its limitations and alerts that are not important in a particular case may appear. Conversely, the absence of alerts does not guarantee there are no aspects of the results needing attention. It is up to the individual to critically assess their own results and, if necessary, seek expert advice.

If you wish to submit your CIF for publication in Acta Crystallographica Section C or E, you should upload your CIF via the web. If you wish to submit your CIF for publication in IUCrData you should upload your CIF via the web. If your CIF is to form part of a submission to another IUCr journal, you will be asked, either during electronic submission or by the Co-editor handling your paper, to upload your CIF via our web site.

---

**PLATON version of 23/04/2018; check.def file version of 23/04/2018**

Datablock I - ellipsoid plot

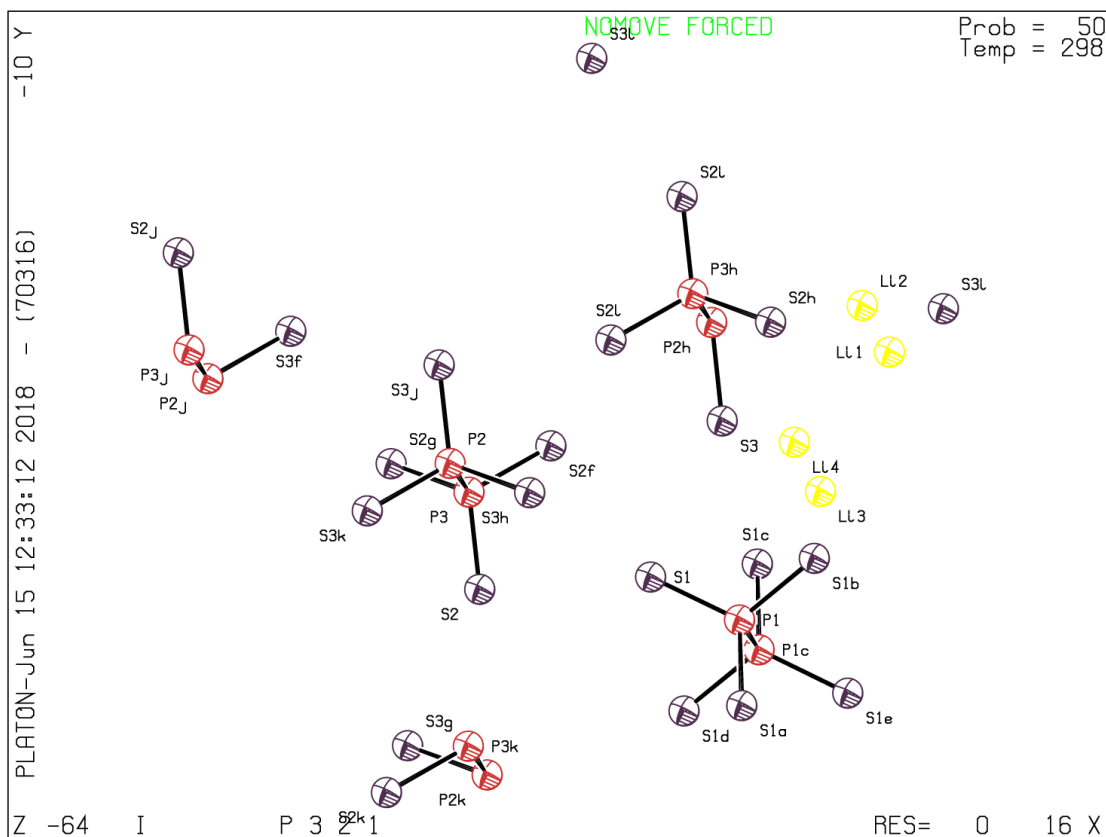

Supplement: c8dt02619j1.pdf [file c8dt02619j1.pdf]
